# Supplementary material for: Hierarchical heterostructures of Bi2MoO6 on carbon nanofibers: controllable solvothermal fabrication and enhanced visible photocatalytic properties
Source: Royal Society of Chemistry journal article supplement (doi:10.1039/c1jm13470a), 2011-11-03
Supplement: c1jm13470a.pdf [file c1jm13470a.pdf]

## **Electronic Supplementary Information**

### **Hierarchical heterostructures of Bi<sub>2</sub>MoO<sub>6</sub> on carbon nanofibers: Controllable solvothermal-fabrication and enhanced visible photocatalytic properties**

Mingyi Zhang, Changlu Shao\*, Jingbo Mu, Xuman Huang, Zhenyi Zhang, Zengcai

Guo, Peng Zhang and Yichun Liu

Center for Advanced Optoelectronic Functional Materials Research, and Key Laboratory of UV Light-Emitting Materials and Technology of Ministry of Education, Northeast Normal University, 5268 Renmin Street, Changchun 130024, People's Republic of China.

\*Corresponding author: Changlu Shao

Center for Advanced Optoelectronic Functional Materials Research, and Key Laboratory of UV Light-Emitting Materials and Technology of Ministry of Education, Northeast Normal University, 5268 Renmin Street, Changchun 130024, People's Republic of China.

E-mail: [clshao@nenu.edu.cn](mailto:clshao@nenu.edu.cn); Tel. 8643185098803.

| Samples | [Precursors] ( mM ) <sup>a</sup>  |                                  | Morphology <sup>b</sup> | Temperature<br>(°C) <sup>c</sup> | Solvent      | Bi/C<br>Molar ratio <sup>d</sup> |
|---------|-----------------------------------|----------------------------------|-------------------------|----------------------------------|--------------|----------------------------------|
|         | Bi(NO <sub>3</sub> ) <sub>3</sub> | Na <sub>2</sub> MoO <sub>4</sub> |                         |                                  |              |                                  |
| B0      | 12                                | 6                                |                         | 160                              | EG + Ethanol |                                  |
| BC1     | 12                                | 6                                | nanosheets              | 160                              | EG + Ethanol | 1 : 11.2                         |
| BC2     | 8                                 | 4                                | nanoflowers             | 160                              | EG + Ethanol | 1 : 17.5                         |
| BC3     | 4                                 | 2                                | nanoparticles           | 160                              | EG + Ethanol | 1 : 33.7                         |
| BC4     | 2                                 | 1                                | nanorods                | 160                              | EG + Ethanol | 1 : 54.6                         |
| BC5     | 12                                | 6                                |                         | 100                              | EG + Ethanol |                                  |
| BC6     | 12                                | 6                                | nanosheets              | 130                              | EG + Ethanol | 1 : 13.8                         |
| BC7     | 12                                | 6                                | nanosheets              | 180                              | EG + Ethanol | 1 : 12.2                         |
| BC8     | 12                                | 6                                | nanoparticles           | 200                              | EG + Ethanol | 1 : 27.5                         |
| BC9     | 12                                | 6                                | nanosheets              | 160                              | Ethanol      | 1 : 47.3                         |
| BC10    | 12                                | 6                                | nanosheets              | 160                              | EG           | 1 : 10.5                         |

<sup>a</sup> In addition to Bi(NO<sub>3</sub>)<sub>3</sub> and Na<sub>2</sub>MoO<sub>4</sub>, 15 mg carbon nanofibers also add to the sample BC1-BC10 as precursor.

<sup>b</sup> The morphology is secondary Bi<sub>2</sub>MoO<sub>6</sub> nanostructures on the Bi<sub>2</sub>MoO<sub>6</sub>-CNFs hierarchical nanostructures.

<sup>c</sup> EG (10mL) + Ethanol (30mL) for the sample B0-BC8. Ethanol (40mL) for the sample BC9. EG (40mL) for the sample BC10.

<sup>d</sup> The value is determined by EDX.

**Table S1.** Experimental conditions, Bi<sub>2</sub>MoO<sub>6</sub> nanostructure characteristics, and chemical component of the prepared samples.

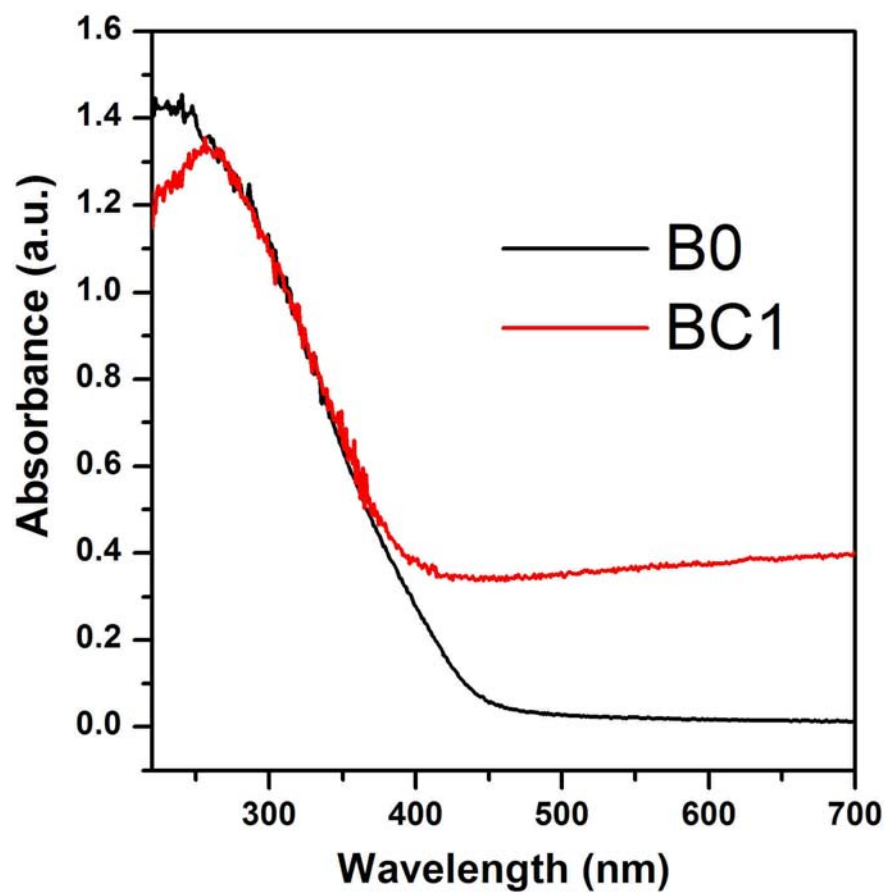

**Fig. S1.** Diffuse reflectance spectra of the  $\text{Bi}_2\text{MoO}_6$ -CNFs samples (BC1) and pure  $\text{Bi}_2\text{MoO}_6$ .

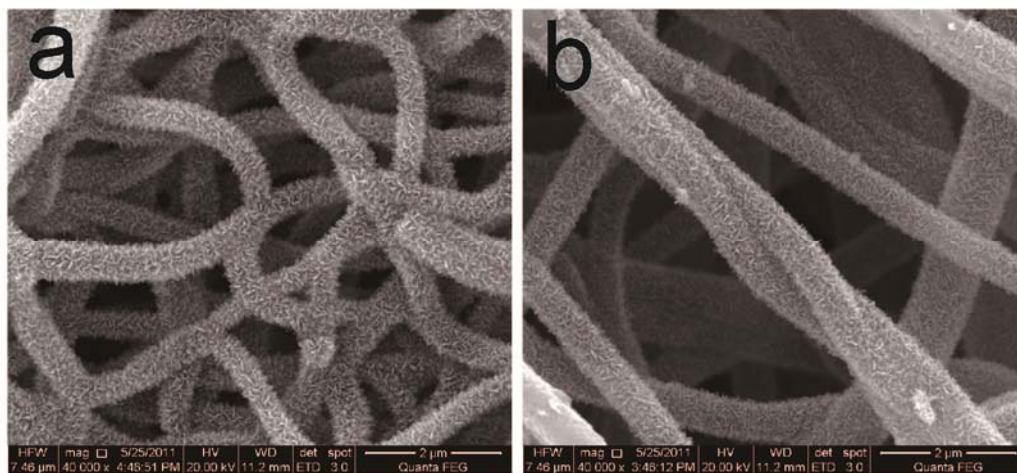

**Fig. S2.** SEM images of Bi<sub>2</sub>MoO<sub>6</sub>-CNFs photocatalyst (a) before and (b) after the photocatalytic reaction.

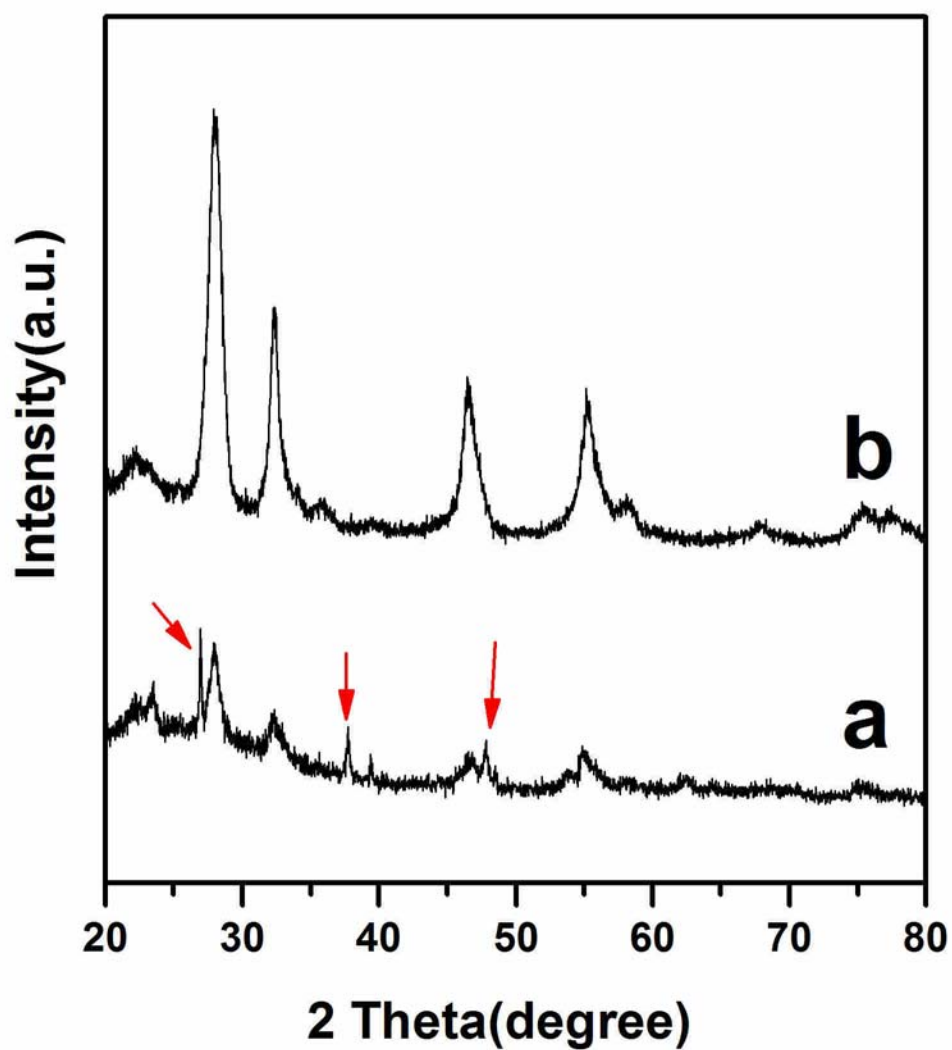

**Fig. S3.** XRD patterns of products prepared from different solvents under solvothermal reaction: (a) 40 mL ethanol; (b) 40 mL ethylene glycol.

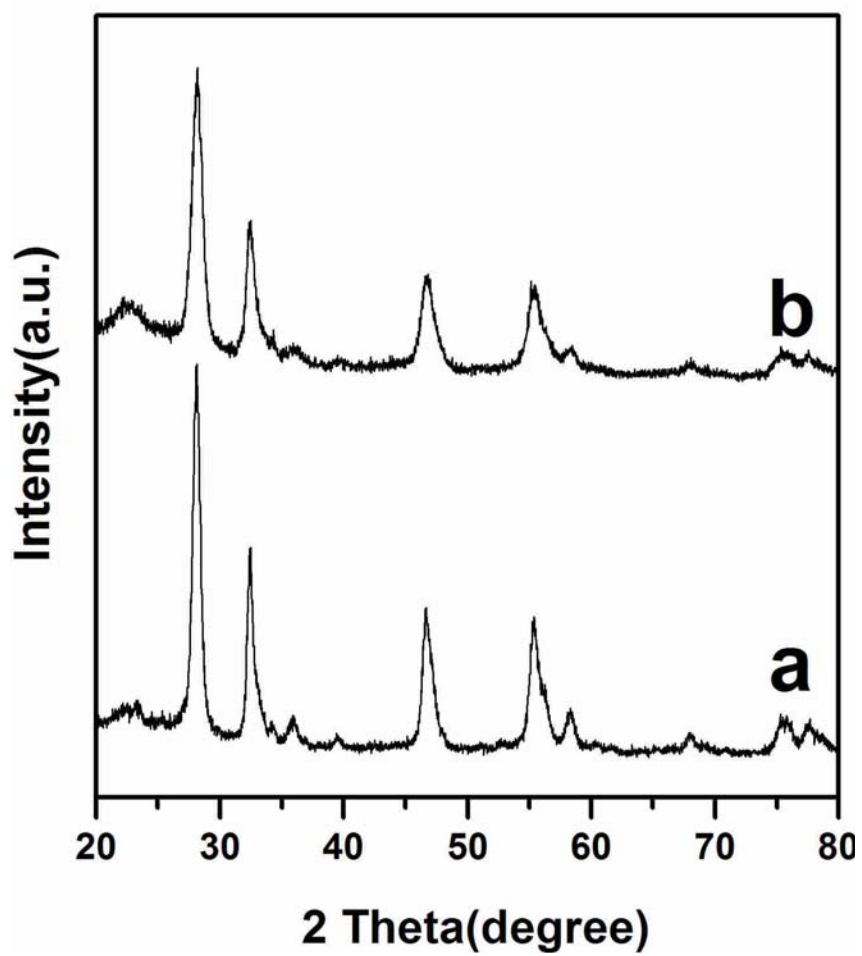

**Fig. S4.** XRD patterns of Bi<sub>2</sub>MoO<sub>6</sub>-CNFs photocatalyst (a) before and (b) after the photocatalytic reaction.
